# Supplementary material for: Molecular insight into invasive group A streptococcal disease
Source: Springer Nature journal article supplement (doi:10.1038/nrmicro2648), 2011-09-16
Supplement: 41579_2011_BFnrmicro2648_MOESM5_ESM.pdf [file 41579_2011_BFnrmicro2648_MOESM5_ESM.pdf]

| S1   Switching mutations observed in <i>covRS</i> in GAS from human isolates and murine models of invasive infections |                 |                        |                                    |           |
|-----------------------------------------------------------------------------------------------------------------------|-----------------|------------------------|------------------------------------|-----------|
| GAS serotype (strain)                                                                                                 | Host*           | Mutation <sup>‡§</sup> | Consequence                        | Reference |
| <b>CovR missense</b>                                                                                                  |                 |                        |                                    |           |
| M11 (NIH323-1)                                                                                                        | H (lung)        | nr                     | D10G                               | 1         |
| M89 (NIH157)                                                                                                          | H (blood)       | nr                     | D10Y                               | 1         |
| M59 (NIH301)                                                                                                          | H (blood)       | nr                     | I30F                               | 1         |
| M1 (NIH447)                                                                                                           | H (blood)       | nr                     | D53E                               | 1         |
| M4 (NIH406)                                                                                                           | H (blood)       | nr                     | D53Q <sup>  </sup>                 | 1         |
| M3 (NIH212)                                                                                                           | H (soft tissue) | nr                     | D60Y                               | 1         |
| M1 (MGAS2221)                                                                                                         | M               | Δ232-234               | ΔM78                               | 2         |
| M1 (MGAS166)                                                                                                          | M               | nr                     | M86V                               | 3         |
| M1 (MGAS166)                                                                                                          | M               | nr                     | R94C                               | 3         |
| M89 (NIH345)                                                                                                          | H (wound)       | nr                     | R94C                               | 1         |
| M91 (NIH252-2)                                                                                                        | H (muscle)      | nr                     | R94C                               | 1         |
| M58 (NIH273)                                                                                                          | H (blood)       | nr                     | G95S <sup>  </sup>                 | 1         |
| M1 (NIH381-1)                                                                                                         | H (wound)       | nr                     | A96V <sup>  </sup>                 | 1         |
| M1 (5448)                                                                                                             | M               | G331A                  | A111T                              | 4         |
| M1 (NIH75)                                                                                                            | H (blood)       | nr                     | A111D                              | 1         |
| M3 (NIH1)                                                                                                             | H (fascia)      | nr                     | R118C <sup>  </sup>                | 1         |
| M81 (TK929)                                                                                                           | H (blood)       | nr                     | R118S                              | 1         |
| M1 (MGAS2221)                                                                                                         | M               | nr                     | R119H                              | 2         |
| M1 (NIH136)                                                                                                           | H (blood)       | nr                     | R119S                              | 1         |
| M3 (NIH300)                                                                                                           | H (blood)       | nr                     | R119L                              | 1         |
| M18 (NIH43)                                                                                                           | H (effusion)    | nr                     | S154P <sup>  </sup>                | 1         |
| M3 (NIH216)                                                                                                           | H (fascia)      | nr                     | W184C                              | 1         |
| M1 (MGAS166)                                                                                                          | M               | nr                     | R203S                              | 3         |
| M1 (MGAS166)                                                                                                          | M               | nr                     | G204D                              | 3         |
| M1 (MGAS166)                                                                                                          | M               | nr                     | ΔK211-G220                         | 3         |
| M3 (NIH9)                                                                                                             | H (blood)       | nr                     | Q216P                              | 1         |
| M1 (NIH44)                                                                                                            | H (blood)       | nr                     | ΔE252                              | 1         |
| <b>CovR nonsense/frameshift</b>                                                                                       |                 |                        |                                    |           |
| M3 (NIH259)                                                                                                           | H (blood)       | nr                     | Truncation at aa 45                | 1         |
| M3 (TK283)                                                                                                            | H (fascia)      | nr                     | Truncation at aa 134 <sup>  </sup> | 1         |
| M3 (NIH404)                                                                                                           | H (soft tissue) | 1bp insert             | Truncation at aa 146               | 1         |
| M1 (MGAS166)                                                                                                          | M               | nr                     | Truncation at aa 159               | 3         |
| <b>CovS missense</b>                                                                                                  |                 |                        |                                    |           |
| M87 (NIH283-1)                                                                                                        | H (blood)       | nr                     | P16L                               | 1         |
| M89 (NIH238)                                                                                                          | H (soft tissue) | nr                     | S204R                              | 1         |
| M1 (NIH222)                                                                                                           | H (soft tissue) | nr                     | A206S                              | 1         |
| M1 (NIH75)                                                                                                            | H (blood)       | nr                     | P220K                              | 1         |
| M28 (NIH35)                                                                                                           | H (blood)       | nr                     | E226G                              | 1         |
| M6 (NIH296)                                                                                                           | H (blood)       | nr                     | M228I, G357D                       | 1         |
| M89 (NIH421)                                                                                                          | H (blood)       | nr                     | R229C                              | 1         |
| M1 (MGAS166)                                                                                                          | M               | nr                     | R241S                              | 3         |
| M81 (NIH268)                                                                                                          | H (soft tissue) | nr                     | R241C                              | 1         |
| M87 (NIH437)                                                                                                          | H (blood)       | nr                     | S246P                              | 1         |
| M1 (MGAS166)                                                                                                          | M               | nr                     | S254F                              | 3         |
| M1 (MGAS166)                                                                                                          | M               | nr                     | M260T                              | 3         |
| M77 (NIH297)                                                                                                          | H (soft tissue) | nr                     | T266I                              | 1         |
| M1 (5448)                                                                                                             | M               | C838T                  | H280Y                              | 4         |
| M1 (MGAS294)                                                                                                          | H (invasive)    | nr                     | V286F                              | 2         |
| M1 (NIH243-1)                                                                                                         | H (blood)       | nr                     | G291R                              | 1         |
| M1 (NIH286)                                                                                                           | H (blood)       | nr                     | I381Y, H437R                       | 1         |
| M12 (NIH263-2)                                                                                                        | H (blood)       | nr                     | N384K <sup>  </sup>                | 1         |

## SUPPLEMENTARY INFORMATION

|                                 |                         |                           |                                    |   |
|---------------------------------|-------------------------|---------------------------|------------------------------------|---|
| M1 (NIH205)                     | H (soft tissue)         | nr                        | Q388R                              | 1 |
| M1 (MGAS6184)                   | H (invasive)            | nr                        | A397V                              | 2 |
| M89 (NIH58)                     | H (joint fluid)         | nr                        | V423A                              | 1 |
| M3 (NIH18)                      | H (effusion)            | nr                        | A456Y <sup>II</sup>                | 1 |
| M1 (NIH220-1)                   | H (blood)               | nr                        | G457V                              | 1 |
| M49 (NIH200-4)                  | H (blood)               | nr                        | G461S                              | 1 |
| M113 (NIH433)                   | H (blood)               | Δ1408-1410                | ΔD470                              | 1 |
| <b>CovS nonsense/frameshift</b> |                         |                           |                                    |   |
| M1 (MGAS5005)                   | H (cerebrospinal fluid) | Δ80                       | Truncation at aa 35                | 2 |
| M1 (5448)                       | M                       | Δ83                       | Truncation at aa 35                | 4 |
| M1 (MGAS166)                    | M                       | Δ76-83::T                 | Truncation at aa 35                | 3 |
| M1 (NIH202-2)                   | H (blood)               | 1bp deletion              | Truncation at aa 35                | 1 |
| M22 (NIH160)                    | H (blood)               | 1bp deletion              | Truncation at aa 35                | 1 |
| M28 (NIH422)                    | H (soft tissue)         | 1bp deletion              | Truncation at aa 35 <sup>II</sup>  | 1 |
| M81 (NIH156-1)                  | H (blood)               | 1bp deletion              | Truncation at aa 35                | 1 |
| M3 (NIH249)                     | H (blood)               | 1bp deletion              | Truncation at aa 35                | 1 |
| M1 (NIH314)                     | H (rubor site)          | 11bp insert               | Truncation at aa 39                | 1 |
| M3 (NIH424-1)                   | H (blood)               | 11bp insert               | Truncation at aa 39                | 1 |
| M49 (NIH269)                    | H (soft tissue)         | 11bp insert               | Truncation at aa 39                | 1 |
| M53 (NIH389)                    | H (soft tissue)         | 11bp insert               | Truncation at aa 39                | 1 |
| M89 (NIH250-2)                  | H (blood)               | 11bp insert               | Truncation at aa 39 <sup>II</sup>  | 1 |
| M112 (NIH287-1)                 | H (soft tissue)         | 11bp insert               | Truncation at aa 39                | 1 |
| M1 (MGAS166)                    | M                       | 218::GAAAA                | Truncation at aa 75                | 3 |
| M1 (NIH102)                     | H (ascites)             | 1bp deletion              | Truncation at aa 76                | 1 |
| M1 (MGAS166)                    | M                       | 321::AA                   | Truncation at aa 110               | 3 |
| M1 (MGAS166)                    | M                       | 342::IS1548               | Insertional inactivation at aa 114 | 3 |
| M3 (TK280)                      | H (blood)               | nr                        | Truncation at aa 131               | 1 |
| M1 (5448)                       | M                       | Δ406-1503                 | Truncation at aa 136               | 4 |
| M22 (NIH236)                    | H (blood)               | TTTT→GAGG                 | Truncation at aa 158 <sup>II</sup> | 1 |
| M3 (NIH152-3)                   | H (blood)               | nr                        | Truncation at aa 160               | 1 |
| M3 (NIH453)                     | H (effusion)            | 1bp deletion              | Truncation at aa 180               | 1 |
| M1 (MGAS166)                    | M                       | 492::T                    | Truncation at aa 181               | 3 |
| M11 (NIH49)                     | H (soft tissue)         | nr                        | Truncation at aa 184               | 1 |
| M98.1 (NS88.2)                  | H (blood)               | G581A                     | Truncation at aa 193               | 5 |
| M87 (NIH372)                    | H (blood)               | nr                        | Truncation at aa 193 <sup>II</sup> | 1 |
| M1 (5448)                       | M                       | 803::A                    | Truncation at aa 268               | 6 |
| M60 (NIH317)                    | H (blood)               | nr                        | Truncation at aa 282               | 1 |
| M1 (5448)                       | M                       | 877::A                    | Truncation at aa 300               | 4 |
| M22 (NIH403)                    | H (blood)               | nr                        | Truncation at aa 369               | 1 |
| M1 (MGAS166)                    | M                       | 1105::T                   | Truncation at aa382                | 3 |
| M1 (MGAS166)                    | M                       | 1136::GC                  | Truncation at aa 390               | 3 |
| M1 (NIH73)                      | H (blood)               | 5bp deletion              | Truncation at aa 407               | 1 |
| M22 (TK76)                      | H (soft tissue)         | 5bp deletion              | Truncation at aa 407               | 1 |
| M23 (A20)                       | H (blood)               | Δ1215-1219                | Truncation at aa 407               | 5 |
| M87 (NIH371)                    | H (blood)               | 5bp deletion              | Truncation at aa 407 <sup>II</sup> | 1 |
| M11 (NIH325-1)                  | H (blood)               | nr                        | Truncation at aa 450               | 1 |
| M1 (MGAS2221)                   | M                       | Δ1250                     | Truncation at aa 457               | 2 |
| M1 (NIH253-1)                   | H (blood)               | 1bp deletion              | Truncation at aa 457               | 1 |
| M89 (NIH5)                      | H (blood)               | 5bp insert                | Truncation at aa 459               | 1 |
| M1 (5448)                       | M                       | G1441T                    | Truncation at aa 480               | 6 |
| M49 (NIH230)                    | H (blood)               | GTTCTTTTT→<br>TCTGCATTTTC | Truncation at aa 39                | 1 |

\*M, isolate from murine invasive disease study; H, human isolate. <sup>†</sup>nr, not reported. <sup>§</sup>Under *in vitro* conditions of general stress, secondary mutations in *covR* can be identified in *covS* mutant M6 GAS<sup>2</sup>; however, these do not appear to occur during human selection of *covS* mutants, as illustrated in this Table. <sup>II</sup>GAS isolate also contained a mutation in the gene encoding Rgg, a positive regulator of SpeB expression.

## SUPPLEMENTARY INFORMATION

1. Ikebe, T. *et al.* Highly frequent mutations in negative regulators of multiple virulence genes in group A streptococcal toxic shock syndrome isolates. *PLoS Pathog.* **6**, e1000832 (2010).
2. Sumbly, P., Whitney, A. R., Graviss, E. A., DeLeo, F. R. & Musser, J. M. Genome-wide analysis of group A streptococci reveals a mutation that modulates global phenotype and disease specificity. *PLoS Pathog.* **2**, e5 (2006).
3. Engleberg, N. C., Heath, A., Miller, A., Rivera, C. & DiRita, V. J. Spontaneous mutations in the *csrRS* two component regulatory system of *Streptococcus pyogenes* result in enhanced virulence in a murine model of skin and soft tissue infection. *J. Infect. Dis.* **183**, 1043–1054 (2001).
4. Walker, M. J. *et al.* DNase Sda1 provides selection pressure for a switch to invasive group A streptococcal infection. *Nature Med.* **13**, 981–985 (2007).
5. Maamary, P. G. *et al.* Parameters governing invasive disease propensity of non-M1 serotype group A streptococci. *J. Innate Immun.* **2**, 596–606 (2010).
6. Cole, J. N. *et al.* M protein and hyaluronic acid are essential for *in vivo* selection of *covRS* mutations characteristic of invasive M1T1 group A *Streptococcus*. *mBio* **1**, e00191-10 (2010).
7. Dalton, T. L. & Scott, J. R. CovS inactivates CovR and is required for growth under conditions of general stress in *Streptococcus pyogenes*. *J. Bacteriol.* **186**, 3928–3937 (2004).
